# Supplementary material for: Association Between Metallic Elements in Diet and Diabetic Retinopathy: A Cross-Sectional Study
Source: Research Square preprint supplement (doi:10.21203/rs.3.rs-6225317/v1), 2025-03-25
Supplement: Supplementary file 1 [file e8d945b81b5dc66f27a1d765.docx]

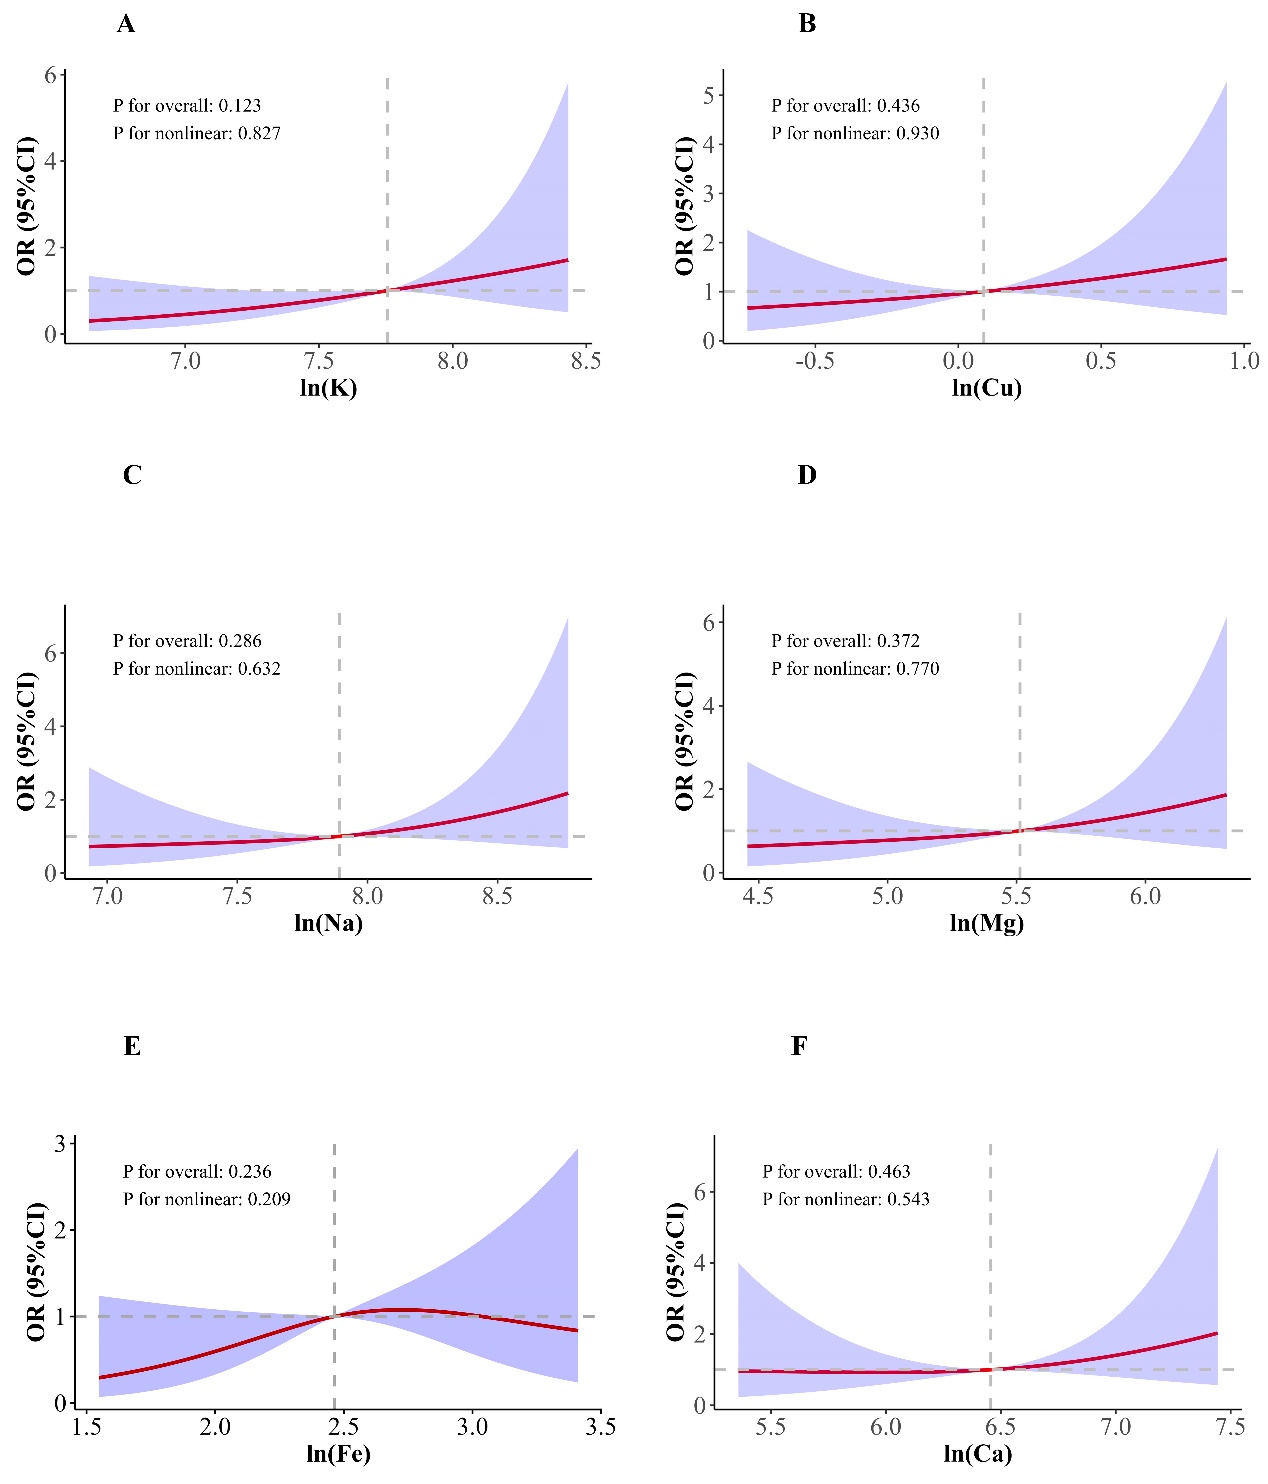


*Supplement Figure 1, RCS plots show the OR change in different metallic elements. (A) RCS plot of K, (B) RCS plot of Cu, (C) RCS plot of Na, (D) RCS plot of Mg, (E) RCS plot of Fe, (F) RCS plot of Ca. The red line indicates the odds ratio (OR), while the blue area denotes the 95% confidence interval.*

| Metallic elements | Model1 |  | Model2 |  | Model3 |  |
| --- | --- | --- | --- | --- | --- | --- |
| OR [95%] | p for trend | OR [95%] | p for trend | OR [95%] | p for trend |
| Zn | 1.13 [1.06, 1.20] | <0.001 | 1.15 [1.05, 1.25] | 0.005 | 1.13 [1.00, 1.27] | 0.046 |
| Cu | 1.77 [0.65, 4.84] | 0.253 | 1.99 [0.74, 5.35] | 0.156 | 1.52 [0.47, 4.90] | 0.401 |
| Fe | 1.06 [1.00, 1.12] | 0.059 | 1.04 [0.96, 1.13] | 0.251 | 1.03 [0.93, 1.13] | 0.548 |
| Na | 1.00 [1.00, 1.00] | 0.454 | 1.00 [1.00, 1.00] | 0.073 | 1.00 [1.00, 1.00] | 0.12 |
| K | 1.00 [1.00, 1.00] | 0.105 | 1.00 [1.00, 1.00] | 0.132 | 1.00 [1.00, 1.00] | 0.22 |
| Ca | 1.00 [1.00, 1.00] | 0.049 | 1.00 [1.00, 1.00] | 0.165 | 1.00 [1.00, 1.00] | 0.299 |
| Mg | 1.00 [1.00, 1.01] | 0.052 | 1.00 [1.00, 1.01] | 0.111 | 1.00 [1.00, 1.01] | 0.249 |

*Supplement Table 1, the tendency analysis between metallic elements and DR risk.*
